# Supplementary material for: Synchronized CVD Growth of Iron Carbide Nanocatalysts within Carbon Nanotube Networks for Stable Lithium–Sulfur Batteries
Source: Research Square preprint supplement (doi:10.21203/rs.3.rs-7559583/v1), 2025-09-16
Supplement: Supplementary file 1 [file 2bfe38e771c253a080282986.docx]

**Synchronized CVD Growth of Iron Carbide Nanocatalysts within Carbon Nanotube Networks for Stable Lithium–Sulfur Batteries**

*Dipsikha Gangulya,e, Abhijitha V Ga,b,d, Tanwir Ansari a, Anamika Ghosha, Ravi Nc, B. R. K. Nandab,d, Seeram Ramakrishna*,e and Sundara Ramaprabhu*a*

aAlternative Energy and Nanotechnology Laboratory, Department of Physics,

IIT Madras, Chennai- 600036, India

bCondensed Matter Theory and Computational Lab, Department of Physics

IIT Madras, Chennai- 600036, India

c. Physics Department, Spelman College
Atlanta,  GA 30314

dCenter for Atomistic Modelling and Materials Design, IIT Madras, Chennai- 600036, India

eDepartment of Mechanical Engineering,

National University of Singapore, Singapore- 117575

**Synthesis Optimization of Fe₅C₂/CNT Composite**

An appropriate amount of commercial Fe2O3 powder was taken as a catalyst to grow iron carbide-CNT composites using the CVD technique. In a typical procedure, through thermal decomposition of acetylene gas over the catalyst at 700 ºC for 5,10 and 30 minutes in the presence of argon as carrier gas. Argon flow (0.16 L/min) was maintained constant throughout the reaction, and hydrogen flow was allowed during 500-700 ºC at a flow rate of 0.05 L/min. The synthesized samples are termed as FeC-5, FeC-10 and FeC-30 (Fe5C2/CNT).


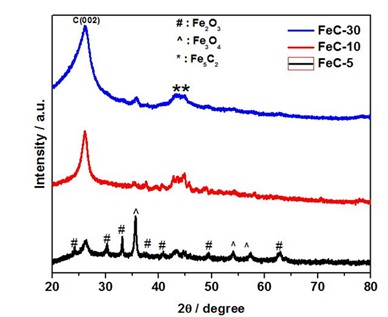


**Figure S1.** XRD studies of Fe5C2/CNT at different deposition time (5 min, 10 min, 30 min)

XRD studies of Fe5C2/CNT composite interlayer are shown in figure S1. The diffraction peak at ~26.3o corresponds to the carbon nanotube's C(002) plane, which is present in all three samples. For 5 min samples, mostly a mixture of Fe2O3 and Fe3O4 phases (as marked) are only observed1,2. However, with increasing time, the reduction in the oxide phases and domination of the carbide phase can be seen. For the 30 min sample, the mostly Fe5C2 phase is observed with a trace amount of Fe3O4 3,4. Also, the change in the FWHM of C (002) substantiates the change in the diameters of the nanotubes with increasing time.

**Microscopic study:**


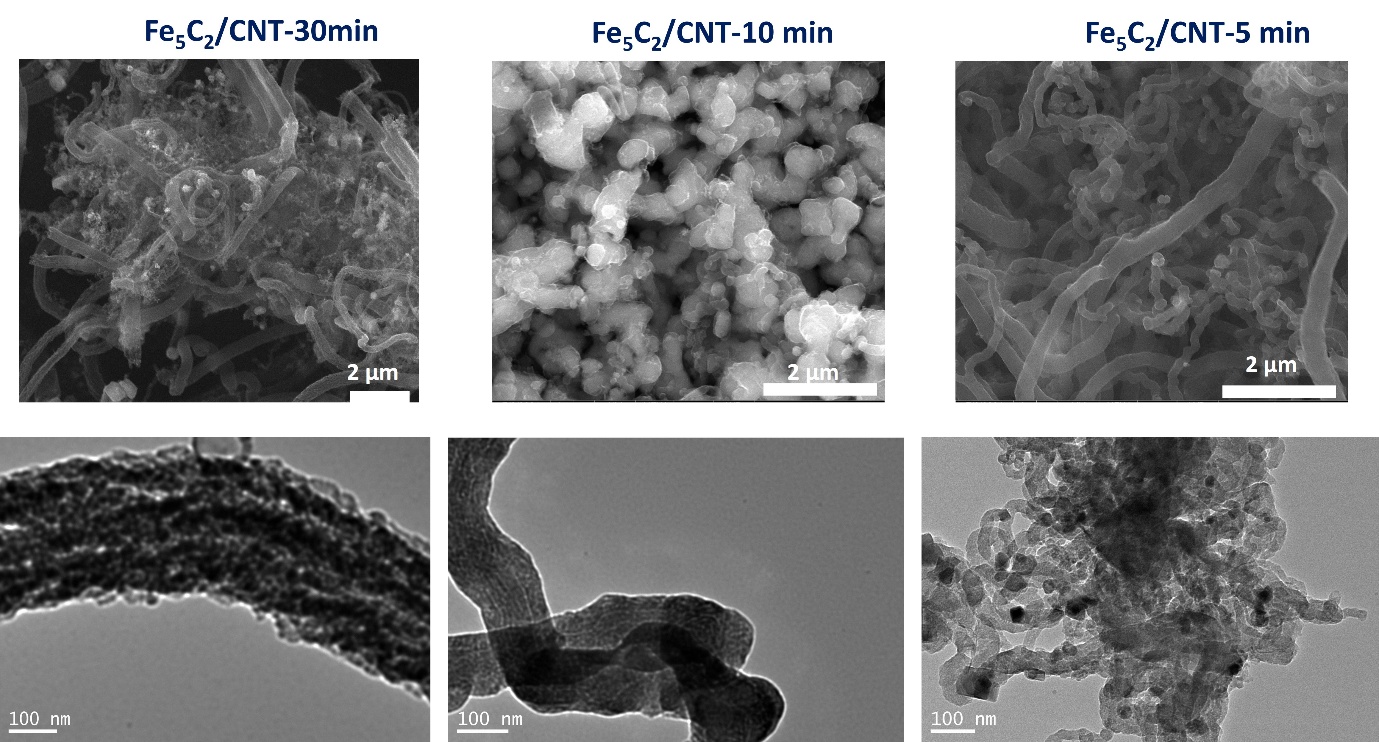


**Figure S2.** SEM and TEM micrograph of Fe5C2/CNT at different deposition tim

**References**

1. Ghosh, A., Srinivas, V. & Sundara, R. Comprehensive structural and magnetic properties of iron oxide nanoparticles synthesized through chemical routes. *J. Alloys Compd.* **818**, 152931 (2020).

2. Ganguly, D., Ajay, A. P., Ghosh, A. & Ramaprabhu, S. Magnetic field assisted high capacity durable Li-ion battery using magnetic α-Fe2O3 nanoparticles decorated expired drug derived N-doped carbon anode. *Sci. Rep.* **10**, 14–18 (2020).

3. Zhang, H. *et al.* Fe3O4-doped mesoporous carbon cathode with a plumber’s nightmare structure for high-performance Li-S batteries. *Nat. Commun.* **15**, 5451 (2024).

4. Ansari, T., Ghosh, A., Ganguly, D., Muthiah, B. & Sundara, R. Expediting Polysulfide Anchoring by Fe3 O4 /Reduced Graphene Oxide Composite for High‐Performance Lithium‐Sulfur Batteries. *Batter. Supercaps* **8**, e202400716 (2025).
